# Supplementary material for: Building a ramp into leadership: Exploring resident doctors’ experiences of a workplace embedded leadership intervention
Source: Research Square preprint supplement (doi:10.21203/rs.3.rs-7591986/v1), 2025-11-06
Supplement: Supplementary file 1 [file 2edcf9c572e34e0683748696.docx]

**Supplementary file 1: Interview questions**

1. **Introduction to the interview:**

Explain to the candidate that we will start by asking questions about the Generic Professional Capabilities Hub and their role within it, and finish by asking them to draw a diagram that represents the network of contacts that have been made through this role and the communication chains between the candidate and these contacts.

1. **What is your clinical role? What drew you to anaesthetics?**
2. **Can you tell me about the GPC Hub? What was your involvement?** When did you first get interested in taking part? What made you want to get involved?
3. **What worked well?**
4. **What might you change?**
5. **Do you think it has changed the way you work?** In what way, can you explain this, can you **give me examples**?
6. **Do you think it has changed your attitude or the way you think?** In what way, can you explain this, can you give me examples?
7. **How have you found balancing this role with your clinical training?**
8. **Has your view of the GPC Hub changed over time?**
9. **Do you think it might have an impact on you in the future?** Examples?
10. **What do you think has been the impact on trainees?**
11. **Who are your key contacts?**
12. **Can you draw a diagram of your contacts explaining:**

- is it a one-way relationship? (can they contact you but you might not contact them) (one or two way arrow)
- is it easy or difficult? (they might not reply, be very slow to reply, might make the interaction awkward or overly complex) (dotted line)
- are they close or distant? (geographically, intellectually) (distant dots)

*This was the basis of a semi-structured interview with the aim of considering trainees’ perceptions of their experience of participation in the Generic Professional Capabilities Hub. Questions in bold indicate the main body of the question, where as non-bold questions indicate possible further questions to help candidates explain their answers more and explore their thoughts and experiences in more detail.*
